# Supplementary material for: Analysis of CXCR5+Th17 cells in relation to disease activity and TNF inhibitor therapy in Rheumatoid Arthritis
Source: PubMed Central journal article supplement (PMC5177940; doi:10.1038/srep39474), 2016-12-22
Supplement: srep39474-s1.pdf [file srep39474-s1.pdf]

# Analysis of CXCR5<sup>+</sup>Th17 cells in relation to disease activity and TNF inhibitor therapy in Rheumatoid Arthritis

Deepika Singh<sup>1</sup>, Matthew Henkel<sup>1</sup>, Bernadette Sendon<sup>1</sup>, June Feng<sup>2</sup>, Anthony Fabio<sup>2</sup>, Diana Metes<sup>3</sup>, Larry W Moreland<sup>1</sup>, Mandy J McGeachy<sup>1\*</sup>

## Supplementary Figure 1

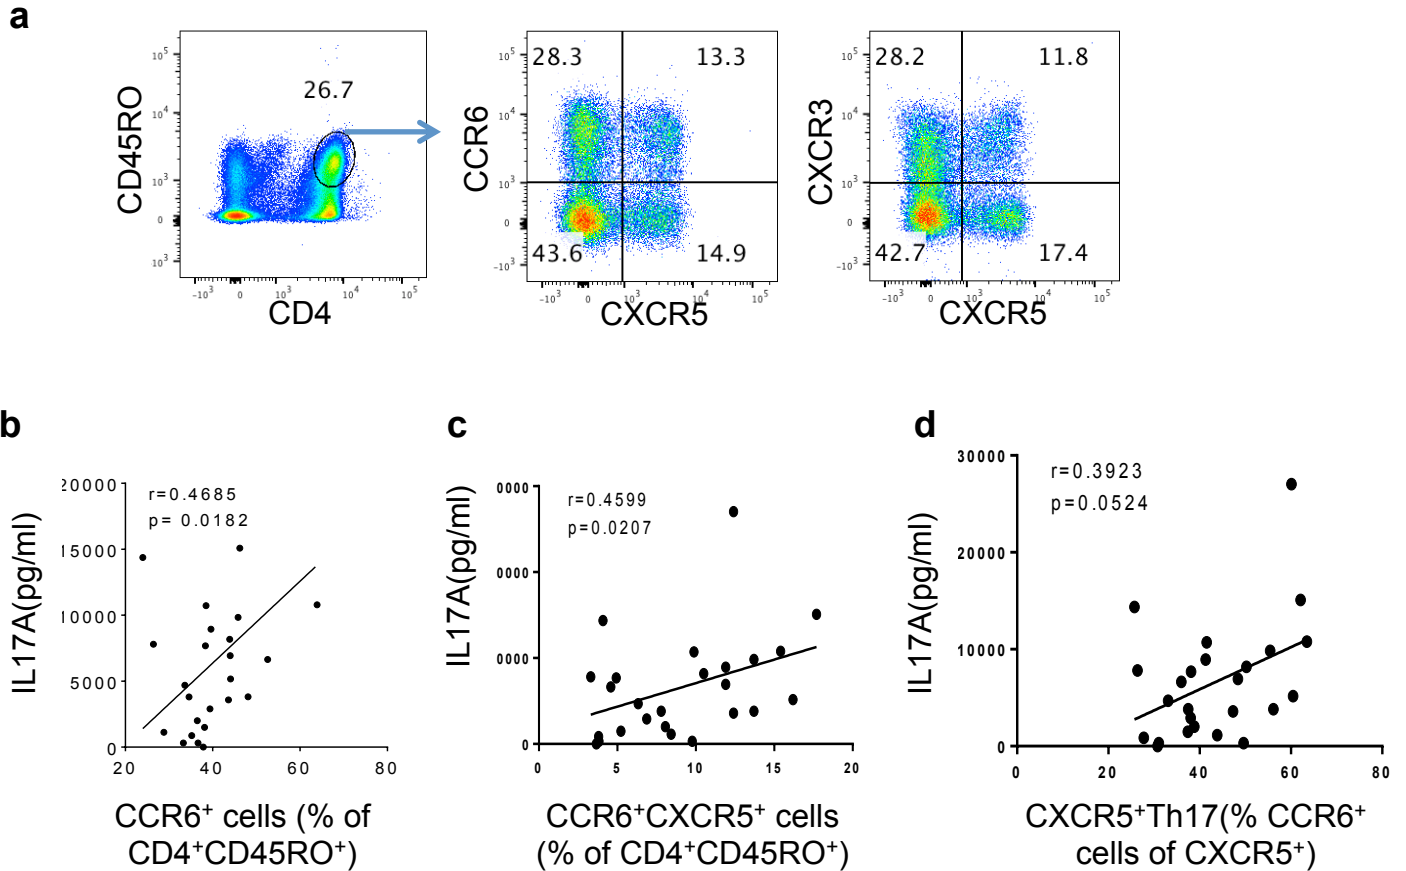

**a:** Healthy control and RA subject blood T cell subsets were analyzed by flow cytometry, representative FACS staining. **b-d:** PBMC from RA subjects were analyzed ex vivo by FACS as shown in **a**, then cultured for 5 days with SEB, CD28, IL23 and IL1, and IL-17 in supernatants was assessed by ELISA.

## Analysis of CXCR5<sup>+</sup>Th17 cells in relation to disease activity and TNF inhibitor therapy in Rheumatoid Arthritis

Deepika Singh<sup>1</sup>, Matthew Henkel<sup>1</sup>, Bernadette Sendon<sup>1</sup>, June Feng<sup>2</sup>, Anthony Fabio<sup>2</sup>, Diana Metes<sup>3</sup>, Larry W Moreland<sup>1</sup>, Mandy J McGeachy<sup>1\*</sup>

### Supplementary table 1

|                  | Donor 1 | Donor 2 | Donor 3 | Donor 4 | Donor 5 |
|------------------|---------|---------|---------|---------|---------|
| FOXP3+of CXCR5+  | 4%      | 0.25 %  | 0.89%   | 1.63%   | 0.60%   |
| FOXP3+of CCR6+   | 4.78%   | 3.78%   | 3.27%   | 3.66%   | 3.81%   |
| CXCR5+ of FOXP3+ | 29.22%  | 4.26%   | 6.82%   | 6.93%   | 6.83%   |
| CCR6+ of FOXP3+  | 69.15%  | 76.28%  | 49.28%  | 53.61%  | 63.60%  |
